# Supplementary material for: A cellular genome-wide association study reveals human variation in microtubule stability and a role in inflammatory cell death
Source: PubMed Central journal article supplement — Mol Biol Cell. 2014 Jan 1;25(1):76–86. doi: 10.1091/mbc.E13-06-0294 (PMC3873895; doi:10.1091/mbc.e13-06-0294), 2014-01-01

# Supplemental Materials

*Molecular Biology of the Cell*

Salinas et al.

**Supplementary Figure S1.** The effects of paclitaxel during *S. typhimurium* infection of LCLs and Hela cells. (A) LCLs demonstrate increased pyroptosis with paclitaxel treatment. LCL 10854 was treated with paclitaxel or colchicine for 30min prior to infection with *S. typhimurium* (MOI30). After 1hr, gentamicin (50µg/ml) was added to kill extracellular bacteria and cell death was assessed by 7-AAD staining 3hrs after initial infection. (B) Hela cells demonstrate increased invasion with colchicine treatment but no effect of paclitaxel treatment. Hela cells, which do not undergo pyroptosis, were treated with paclitaxel or colchicine for 30min prior to infection with *S. typhimurium* (MOI10). After 1hr, gentamicin (50µg/ml) was added to kill extracellular bacteria and after an additional hour, IPTG was added to induce expression of living intracellular GFP+ *S. typhimurium*. GFP+ cells were quantified by flow cytometry.

**A**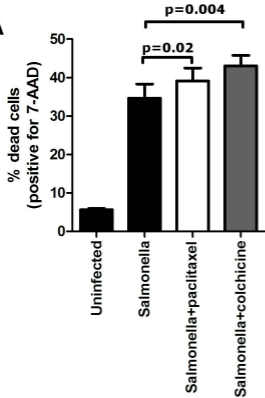**B**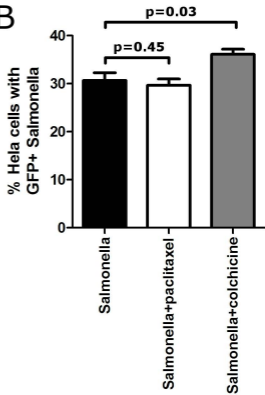

Supplement: supp_E13-06-0294v1_CombinedSupMats.pdf [file supp_E13-06-0294v1_CombinedSupMats.pdf]
